# Supplementary material for: Muffin-like lanthanide complexes with an N5O2-donor macrocyclic ligand showing field-induced single-molecule magnet behaviour
Source: Royal Society of Chemistry journal article supplement (doi:10.1039/c6dt02537d), 2016-01-01
Supplement: c6dt02537d1.pdf [file c6dt02537d1.pdf]

## Electronic Supplementary Information (ESI)

for

### **Muffin-like lanthanide complexes with an $N_5O_2$ -donor macrocyclic ligand showing field-induced single-molecule magnet behaviour**

Peter Antal, Bohuslav Drahoš, Radovan Herchel and Zdeněk Trávníček\*

Department of Inorganic Chemistry, Regional Centre of Advanced Technologies and Materials,  
Palacký University, 17. listopadu 12, CZ-771 46 Olomouc, Czech Republic

\*zdenek.travnicek@upol.cz

## Table of contents

- Figure S1.** A comparison of the X-ray powder diffraction patterns of compounds **2** and **3**. (S3)
- Figure S2.** Molecular structure of the  $[\text{Dy}(\text{L})(\text{H}_2\text{O})(\text{NO}_3)]^{2+}$  complex cation and coordination geometry of the  $[\text{DyN}_5\text{O}_4]$  core in **2**. (S3)
- Figure S3.** Photoluminescence spectra of **1** and a  $\text{Tb}^{\text{III}}$  complex of the parent 15- $\text{N}_3\text{O}_2$  macrocyclic ligand without 2-pyridylmethyl pendant arms measured in acetonitrile/methanol solution at room temperature. The  $\text{Tb}^{\text{III}}$  complex of 15-py $\text{N}_3\text{O}_2$  was prepared *in situ* by mixing of equimolar amounts of  $\text{Tb}(\text{NO}_3)_3 \cdot 5\text{H}_2\text{O}$  and 15-py $\text{N}_3\text{O}_2$ . (S4)
- Figure S4.** The analysis of the molar susceptibilities for **1–3** with Curie-Weiss law in the temperature range of 25–300 K. (S5)
- Figure S5.** The in-phase  $\chi_{\text{real}}$  and out-of-phase  $\chi_{\text{imag}}$  molar susceptibilities for **1–3** at zero and in non-zero static magnetic field. (S6)
- Figure S6.** *Top:* frequency dependence of in-phase  $\chi_{\text{real}}$  and out-of-phase  $\chi_{\text{imag}}$  molar susceptibilities for **2** at  $B_{\text{DC}} = 0.1$  T. Full points – experimental data, full lines – fitted data using eq. 6. *Bottom:* Argand (Cole-Cole) plot and fit of resulting relaxation times according to Arrhenius law (red line), where only data having maxima in the Argand diagram were used. (S7)
- Figure S7.** Analysis of in-phase  $\chi_{\text{real}}$  and out-of-phase  $\chi_{\text{imag}}$  molar susceptibilities for **1–3** measured at the applied external field  $B_{\text{DC}} = 0.1$  T. (S8)
- Figure S8.** Representations of the geometries of  $[\text{Dy}(\text{L})(\text{H}_2\text{O})(\text{NO}_3)](\text{NO}_3)_2$  (**2**, *top*) and  $[\text{Er}(\text{L})(\text{H}_2\text{O})(\text{NO}_3)](\text{NO}_3)_2$  (**3**, *bottom*) which were used in CASSCF calculations and easy axes of the ground state (KD1) and first excited (KD2) Kramer doublets. Dotted lines represent the O–H $\cdots$ O hydrogen bonds. (S9)
- Table S1.** Results of continuous shape calculations using program Shape 2.1 for complexes **1** and **2**. (S10)
- Table S2.** Selected hydrogen bonds and other non-covalent contacts in the crystal structures of **1** and **2**. (S10)
- Table S3.** Parameters of one-component Debye model for the  $\text{Dy}^{\text{III}}$  complex **2**. (S11)
- Table S4** Energy levels ( $\text{cm}^{-1}$  or K) of the lowest ligand field multiplets in zero magnetic field derived from CASSCF/DKH2/SINGLE\_ANISO calculations of  $[\text{Tb}(\text{L})(\text{H}_2\text{O})(\text{NO}_3)](\text{NO}_3)_2$  **1** with the respective  $g$ -factors derived for each Kramer's doublet with the effective spin of 1/2. (S11)
- Table S5** Energy levels ( $\text{cm}^{-1}$  or K) of the lowest ligand field multiplets in zero magnetic field derived from CASSCF/DKH2/SINGLE\_ANISO calculations of  $[\text{Dy}(\text{L})(\text{H}_2\text{O})(\text{NO}_3)](\text{NO}_3)_2$  **2** with the respective  $g$ -factors derived for each Kramer's doublet with the effective spin of 1/2. (S11)
- Table S6** Energy levels ( $\text{cm}^{-1}$  or K) of the lowest ligand field multiplets in zero magnetic field derived from CASSCF/DKH2/SINGLE\_ANISO calculations of  $[\text{Er}(\text{L})(\text{H}_2\text{O})(\text{NO}_3)](\text{NO}_3)_2$  **3** with respective  $g$ -factors derived for each Kramer's doublet with the effective spin of 1/2. (S12)

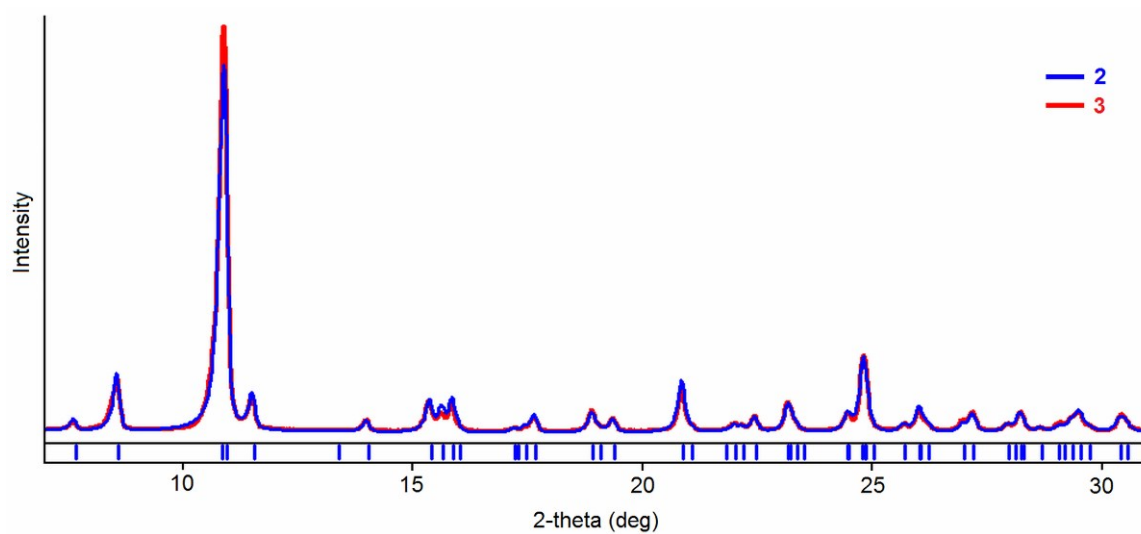

**Figure S1.** A comparison of the X-ray powder diffraction patterns of compounds **2** (blue) and **3** (red).

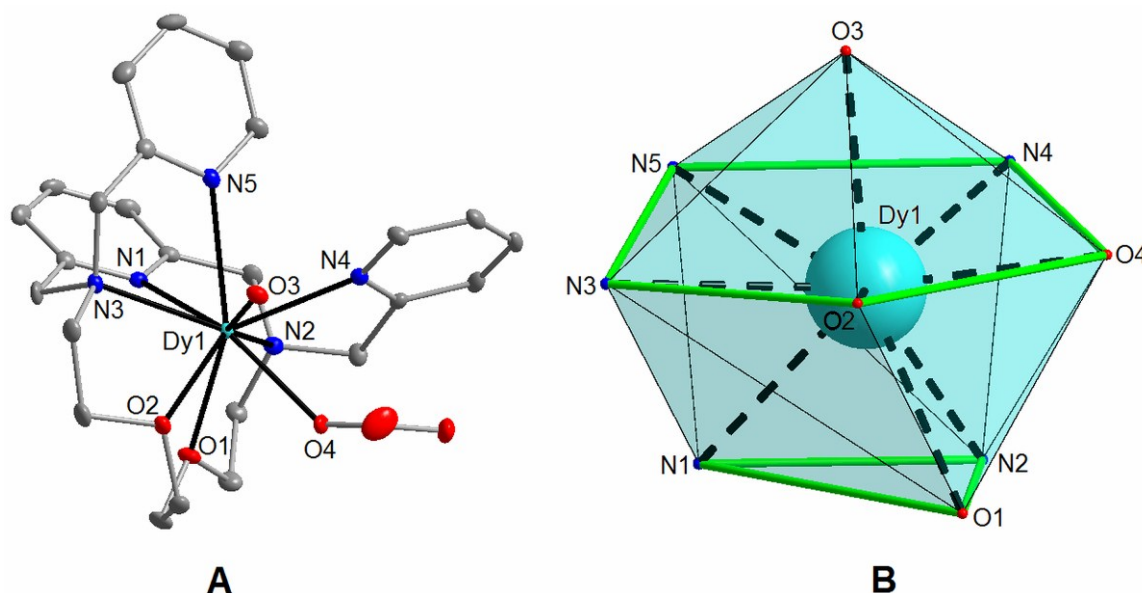

**Figure S2.** (A) Molecular structure of the  $[\text{Dy}(\text{L})(\text{H}_2\text{O})(\text{NO}_3)]^{2+}$  complex cation in **2**. Thermal ellipsoids are drawn with 50% probability level. The hydrogen atoms are omitted for clarity. (B) The coordination geometry of the  $[\text{DyN}_5\text{O}_4]$  core in **2**.

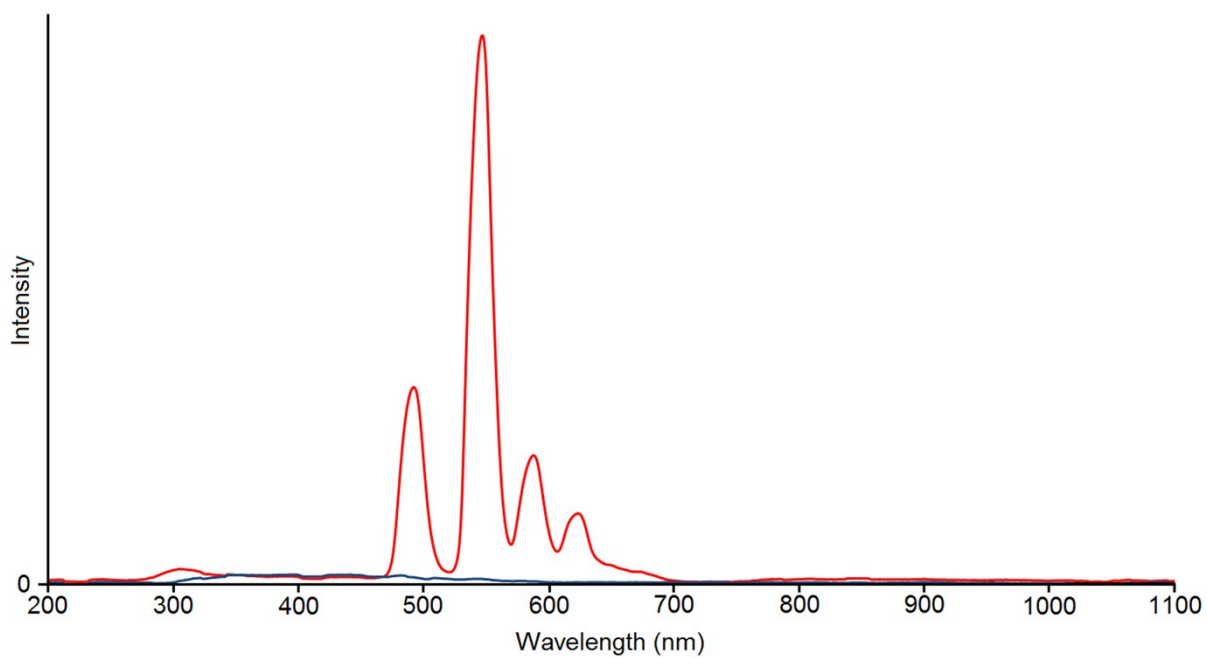

**Figure S3.** Photoluminescence spectra of **1** (red line) and Tb<sup>III</sup> complex of the parent 15-N<sub>3</sub>O<sub>2</sub> macrocyclic ligand without 2-pyridylmethyl pendant arms (dark blue) measured in acetonitrile/methanol solution ( $c = 1 \times 10^{-3}$  mol dm<sup>-3</sup>) at room temperature. The Tb<sup>III</sup> complex of 15-N<sub>3</sub>O<sub>2</sub> was prepared *in situ* by mixing of equimolar amounts of Tb(NO<sub>3</sub>)<sub>3</sub>·5H<sub>2</sub>O and 15-N<sub>3</sub>O<sub>2</sub>.

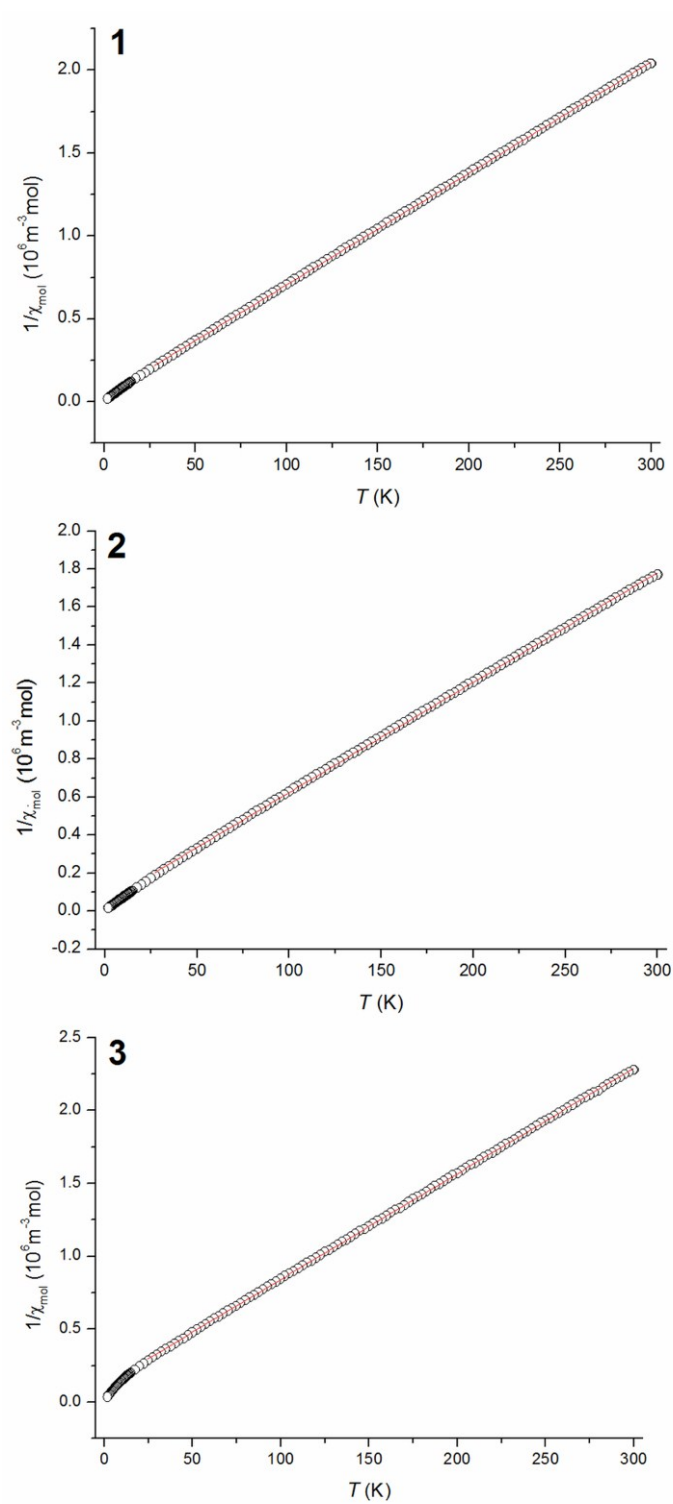

**Figure S4.** The analysis of the molar susceptibilities for **1–3** with Curie-Weiss law in the temperature range of 25–300 K. Empty circles – experimental data, full lines – calculated data.

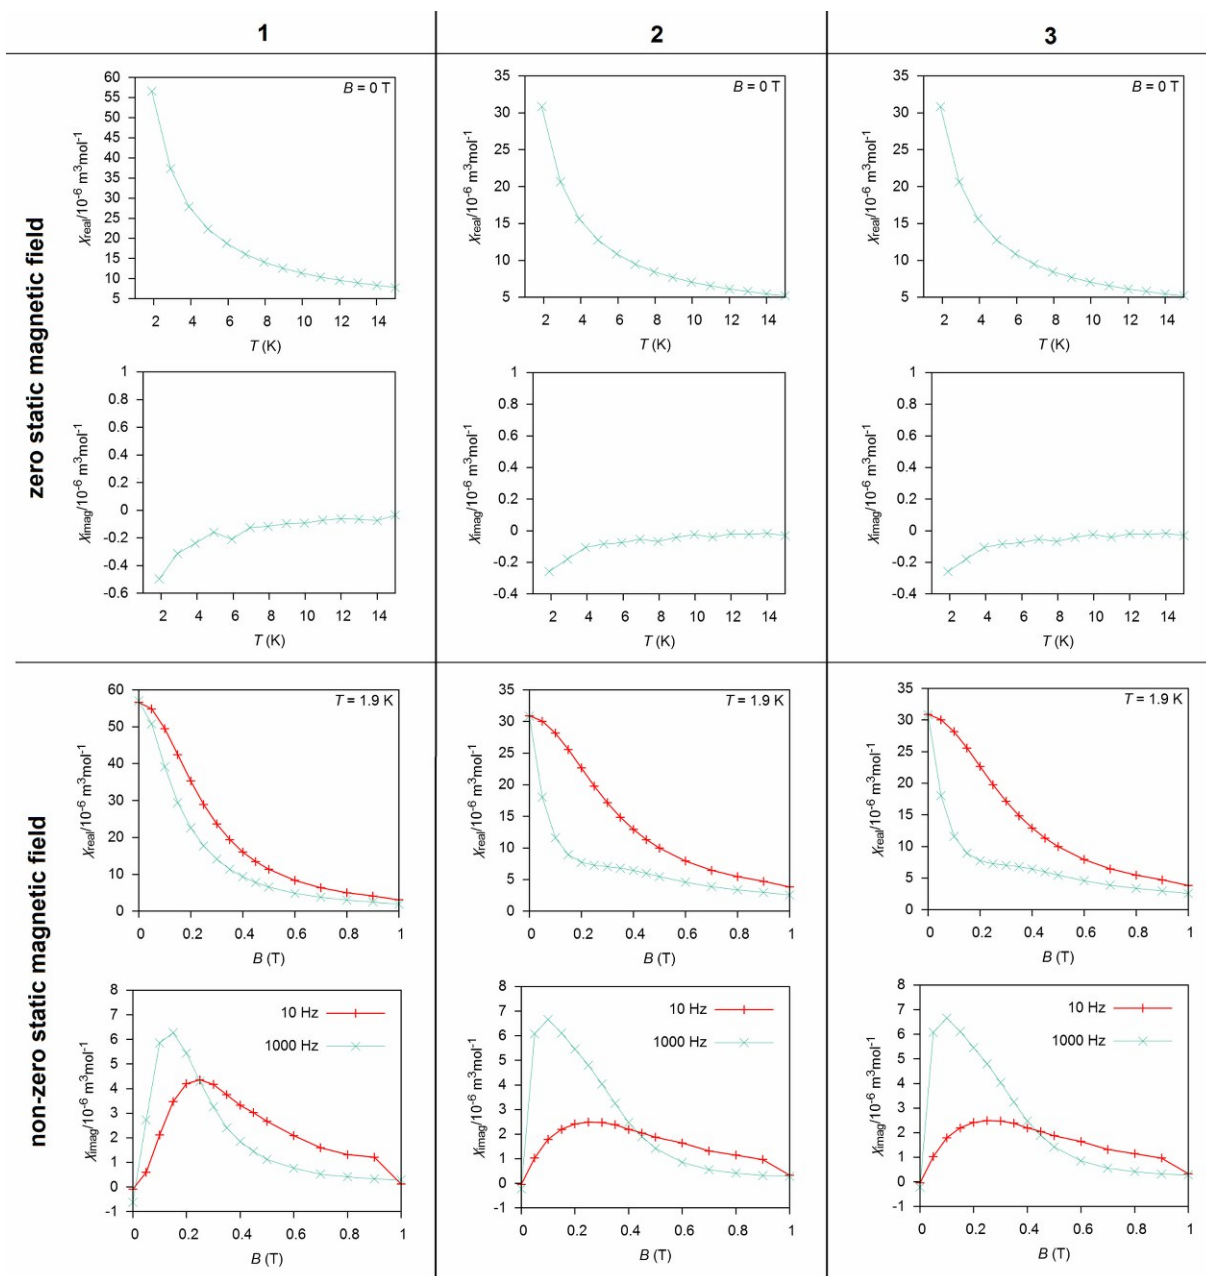

**Figure S5.** The in-phase  $\chi_{\text{real}}$  and out-of-phase  $\chi_{\text{imag}}$  molar susceptibilities for **1–3** at zero static magnetic field (left) and in non-zero static magnetic field  $B = 0.1 \text{ T}$  (right).

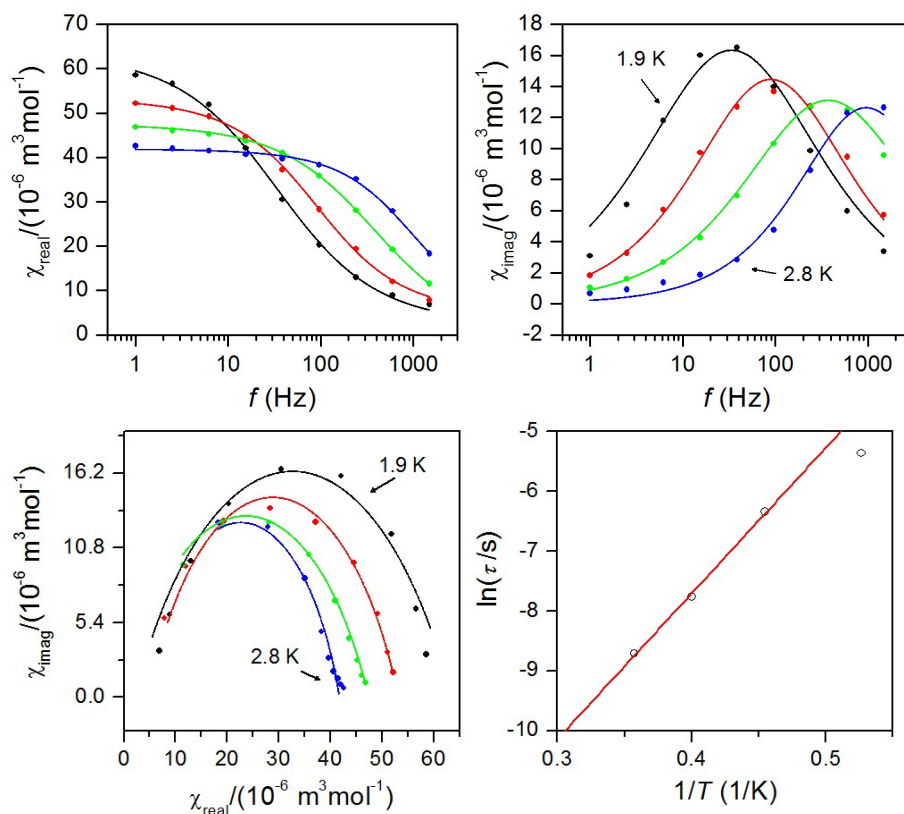

**Figure S6.** *Top:* frequency dependence of in-phase  $\chi_{\text{real}}$  and out-of-phase  $\chi_{\text{imag}}$  molar susceptibilities for **2** at  $B_{\text{DC}} = 0.1$  T. Full points – experimental data, full lines – fitted data using eq. 6. *Bottom:* Argand (Cole-Cole) plot and fit of resulting relaxation times according to Arrhenius law (red line), where only data having maxima in the Argand diagram were used.

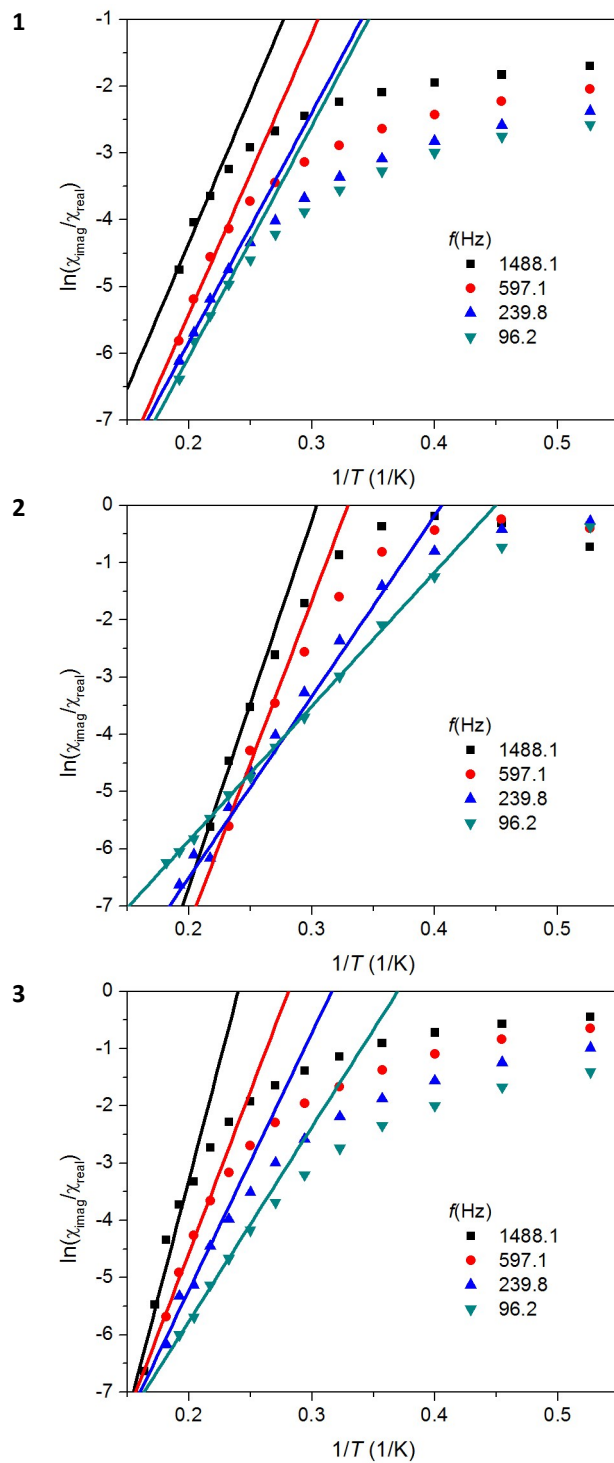

**Figure S7.** Analysis of in-phase  $\chi_{\text{real}}$  and out-of-phase  $\chi_{\text{imag}}$  molar susceptibilities for **1–3** measured at the applied external field  $B_{\text{DC}} = 0.1$  T according to eq. 2. Full points – experimental data, full lines – calculated data.



2

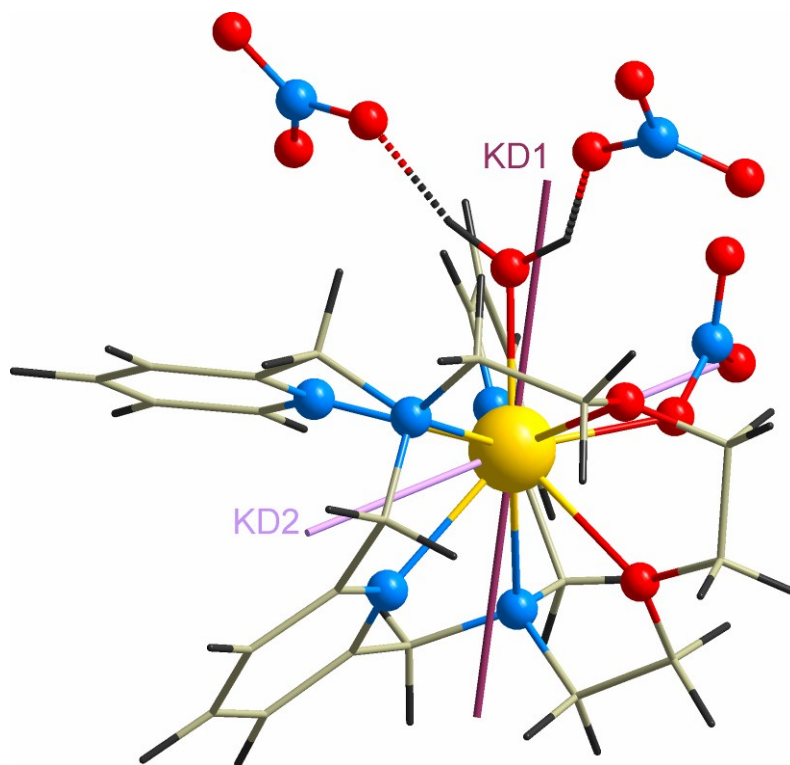

3

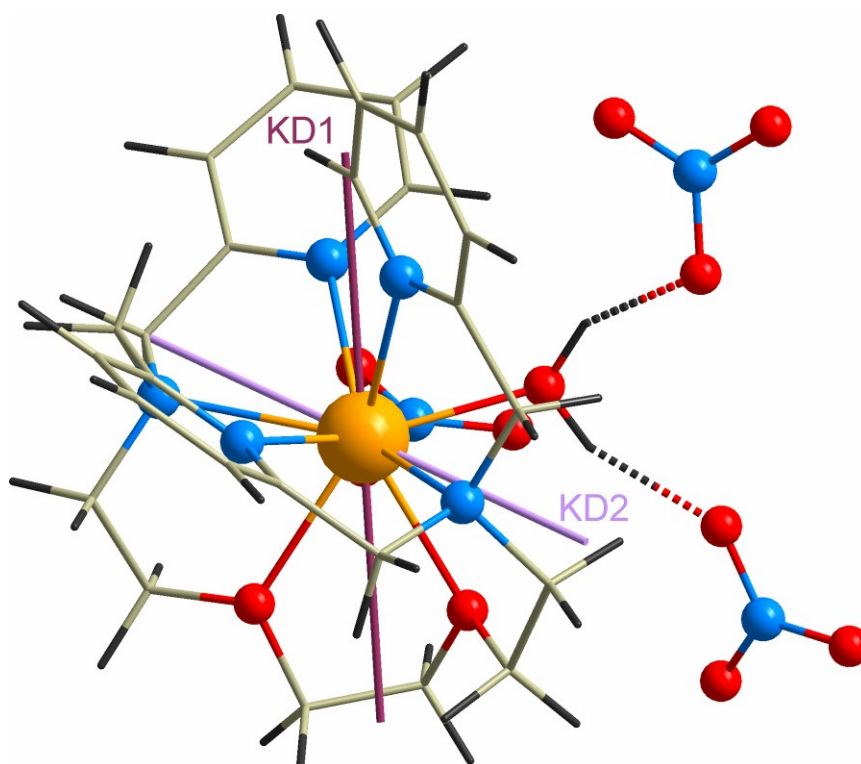

**Figure S8.** Representations of the geometries of  $[\text{Dy}(\text{L})(\text{H}_2\text{O})(\text{NO}_3)](\text{NO}_3)_2$  (**2**, *top*) and  $[\text{Er}(\text{L})(\text{H}_2\text{O})(\text{NO}_3)](\text{NO}_3)_2$  (**3**, *bottom*) which were used in CASSCF calculations and easy axes of the ground state (KD1) and first excited (KD2) Kramer doublets. Dotted lines represent the O–H···O hydrogen bonds.

**Table S1.** Results of continuous shape calculations using program Shape 2.1 for complexes **1** and **2**.<sup>a</sup>

|                     | Tb(III) | Dy(III) |
|---------------------|---------|---------|
| CN = 9 <sup>b</sup> |         |         |
| EP-9                | 34.013  | 34.075  |
| OPY-9               | 20.955  | 20.930  |
| HBPY-9              | 16.739  | 16.822  |
| JTC-9               | 14.546  | 14.581  |
| JCCU-9              | 9.017   | 9.046   |
| CCU-9               | 7.831   | 7.883   |
| JCSAPR-9            | 2.748   | 2.698   |
| CSAPR-9             | 1.785   | 1.748   |
| JTCTPR-9            | 4.116   | 4.043   |
| TCTPR-9             | 1.764   | 1.722   |
| JTDIC-9             | 11.193  | 11.214  |
| HH-9                | 10.386  | 10.420  |
| MFF-9               | 1.045   | 1.042   |

<sup>a</sup> the listed values correspond to the deviation between the ideal and real coordination polyhedra, the lowest values are given in red colour.

<sup>b</sup> EP-9 = enneagon, OPY-9 = octagonal pyramid, HBPY-9 = heptagonal bipyramid, JTC-9 = Johnson triangular cupola J3, JCCU-9 = capped cube J8, CCU-9 = spherical-relaxed capped cube, JCSAPR-9 = capped square antiprism, CSAPR-9 = spherical capped square antiprism, JTCTPR-9 = tricapped trigonal prism J51, TCTPR-9 = spherical tricapped trigonal prism, JTDIC-9 = tridiminished icosahedron, HH-9 = hula-hoop, MFF-9 = muffin.

**Table S2.** Selected hydrogen bonds and other non-covalent contacts in the crystal structures of **1** and **2**.

| D–H...A <sup>a</sup>              | <i>d</i> (D...H) [Å] | <i>d</i> (H...A) [Å] | <i>d</i> (D...A) [Å] | ∠(D...H) [°] |
|-----------------------------------|----------------------|----------------------|----------------------|--------------|
| <b>1</b>                          |                      |                      |                      |              |
| O(3)–H(3V)···O(12)                | 0.82                 | 2.05                 | 2.746                | 142.7        |
| O(3)–H(3W)···O(8)                 | 0.83                 | 1.87                 | 2.660                | 158.4        |
| C(11)–H(11A)···O(11) <sup>b</sup> | 0.95                 | 2.51                 | 3.150                | 124.7        |
| C(13)–H(13A)···O(5)               | 0.95                 | 2.54                 | 3.315                | 139.0        |
| C(17)–H(17A)···O(5) <sup>c</sup>  | 0.95                 | 2.51                 | 3.339                | 146.1        |
| C(24)–H(24A)···O(12) <sup>d</sup> | 0.95                 | 2.50                 | 3.382                | 154.4        |
| C(19)–H(19A)···N(5)               | 0.95                 | 2.54                 | 3.156                | 122.5        |
| C(3A)–H(3A)···N(8) <sup>e</sup>   | 0.99                 | 2.45                 | 3.325                | 147.6        |
| <b>2</b>                          |                      |                      |                      |              |
| O(3)–H(3V)···O(11)                | 0.82                 | 2.03                 | 2.750                | 145.1        |
| O(3)–H(3W)···O(8)                 | 0.83                 | 1.90                 | 2.662                | 151.9        |
| C(11)–H(11A)···O(5)               | 0.95                 | 2.54                 | 3.316                | 138.8        |
| C(13)–H(13A)···O(10) <sup>f</sup> | 0.95                 | 2.50                 | 3.143                | 125.1        |
| C(17)–H(17A)···O(11) <sup>g</sup> | 0.95                 | 2.51                 | 3.391                | 153.9        |
| C(18)–H(18A)···O(8) <sup>h</sup>  | 0.95                 | 2.67                 | 3.356                | 130.0        |
| C(25)–H(25A)···N(4)               | 0.95                 | 2.54                 | 3.148                | 122.3        |
| C(8A)–H(8A)···N(8) <sup>e</sup>   | 0.99                 | 2.45                 | 3.326                | 147.4        |

<sup>a</sup>Symmetry transformations used to generate equivalent atoms: <sup>b</sup>*x*, *-y*+1, *z*+1/4. <sup>c</sup>*x*, *-y*, *z*+1/4. <sup>d</sup>*-x*, *y*-1, *z*-1/4. <sup>e</sup>*x*+1, *-y*+1, *z*+1/4. <sup>f</sup>*x*, *-y*+2, *z*+1/4. <sup>g</sup>*-x*+1, *y*+1, *z*-1/4. <sup>h</sup>*x*-1, *-y*+1, *z*+1/4.

**Table S3.** Parameters of one-component Debye model for the Dy<sup>III</sup> complex **2** derived according to eq.1 in the main text.

| T/K | $\chi_s/(10^{-6} \text{ m}^3\text{mol}^{-1})$ | $\chi_T/(10^{-6} \text{ m}^3\text{mol}^{-1})$ | $\alpha$ | $\tau/(10^{-4} \text{ s})$ |
|-----|-----------------------------------------------|-----------------------------------------------|----------|----------------------------|
| 1.9 | 2.148                                         | 63.462                                        | 0.378    | 46.817                     |
| 2.2 | 4.743                                         | 53.209                                        | 0.316    | 17.579                     |
| 2.5 | 0.002                                         | 47.464                                        | 0.358    | 4.242                      |
| 2.8 | 3.734                                         | 41.807                                        | 0.255    | 1.648                      |
| 3.1 | 21.593                                        | 39.314                                        | 0.258    | 1.984                      |

**Table S4** Energy levels (cm<sup>-1</sup> or K) of the lowest ligand field multiplets in zero magnetic field derived from CASSCF/DKH2/SINGLE\_ANISO calculations of [Tb(L)(H<sub>2</sub>O)(NO<sub>3</sub>)](NO<sub>3</sub>)<sub>2</sub> **1** with the respective *g*-factors derived for each Kramer's doublet with the effective spin 1/2.

| Energy (cm <sup>-1</sup> ) | Energy (K) | <i>g<sub>x</sub></i> | <i>g<sub>y</sub></i> | <i>g<sub>z</sub></i> |
|----------------------------|------------|----------------------|----------------------|----------------------|
| 0.000                      | 0.000      |                      |                      |                      |
| 0.695                      | 1.000      | 0.000000103          | 0.000000273          | 16.675081359         |
| 23.137                     | 33.289     |                      |                      |                      |
| 27.367                     | 39.375     |                      |                      |                      |
| 67.869                     | 97.648     |                      |                      |                      |
| 83.357                     | 119.931    |                      |                      |                      |
| 99.152                     | 142.657    |                      |                      |                      |
| 126.438                    | 181.915    |                      |                      |                      |
| 140.271                    | 201.818    |                      |                      |                      |
| 199.698                    | 287.319    |                      |                      |                      |
| 204.141                    | 293.712    |                      |                      |                      |
| 376.397                    | 541.548    |                      |                      |                      |
| 376.714                    | 542.004    |                      |                      |                      |

**Table S5** Energy levels (cm<sup>-1</sup> or K) of the lowest ligand field multiplets in zero magnetic field derived from CASSCF/DKH2/SINGLE\_ANISO calculations of [Dy(L)(H<sub>2</sub>O)(NO<sub>3</sub>)](NO<sub>3</sub>)<sub>2</sub> **2** with the respective *g*-factors derived for each Kramer's doublet with the effective spin 1/2.

| Energy (cm <sup>-1</sup> ) | Energy (K) | <i>g<sub>x</sub></i> | <i>g<sub>y</sub></i> | <i>g<sub>z</sub></i> |
|----------------------------|------------|----------------------|----------------------|----------------------|
| 0                          | 0.000      | 0.123208278          | 0.401662841          | 19.214014361         |
| 38.243                     | 55.023     | 0.356141137          | 0.826105795          | 18.433216066         |
| 113.567                    | 163.397    | 3.918803592          | 4.811990429          | 12.560372284         |
| 150.540                    | 216.592    | 1.850824694          | 2.945792689          | 13.510993216         |
| 190.234                    | 273.703    | 7.954737034          | 5.663277147          | 3.008111909          |
| 296.665                    | 426.832    | 0.459719199          | 0.947727009          | 14.713092241         |
| 332.608                    | 478.546    | 0.139527338          | 0.371625830          | 18.288261450         |
| 391.878                    | 563.822    | 0.247472833          | 0.431595384          | 17.241550158         |

**Table S6** Energy levels ( $\text{cm}^{-1}$  or K) of the lowest ligand field multiplets in zero magnetic field derived from CASSCF/DKH2/SINGLE\_ANISO calculations of  $[\text{Er}(\text{L})(\text{H}_2\text{O})(\text{NO}_3)](\text{NO}_3)_2$  **3** with respective  $g$ -factors derived for each Kramer's doublet with the effective spin  $1/2$ .

| Energy<br>( $\text{cm}^{-1}$ ) | Energy<br>(K) | $g_x$       | $g_y$       | $g_z$        |
|--------------------------------|---------------|-------------|-------------|--------------|
| 0.000                          | 0.000         | 1.123801903 | 2.180915307 | 13.849557162 |
| 47.928                         | 68.957        | 0.771485743 | 2.219025733 | 11.176748604 |
| 69.830                         | 100.469       | 3.012527039 | 5.223582763 | 8.198121785  |
| 133.220                        | 191.673       | 1.949056313 | 2.887259140 | 10.494647672 |
| 159.320                        | 229.225       | 1.280224132 | 4.288008015 | 8.089948499  |
| 213.909                        | 307.766       | 8.967453663 | 5.443248836 | 0.007673973  |
| 269.653                        | 387.968       | 0.225782405 | 3.578347299 | 7.125835001  |
| 319.015                        | 458.989       | 1.252656637 | 5.766399195 | 12.068693060 |
